# Supplementary material
Source: PubMed Central journal article supplement (PMC10972606)
Supplement: NIHMS1941764-supplement-1.pdf [file NIHMS1941764-supplement-1.pdf]

## **ASSOCIATED CONTENT**

### **Supporting Information**

The Supporting Information is available free of charge on the ACS Publications website.

Experimental details, characterization, NMR and x-ray data for isolated compounds (PDF)

CCDC 2240755 (C), 2240756 (3), 2240757 (7)
